# Supplementary material for: Investigation of Gene Regulatory Networks Associated with Autism Spectrum Disorder Based on MiRNA Expression in China
Source: PubMed Central journal article supplement (PMC4462583; doi:10.1371/journal.pone.0129052), 2015-06-10

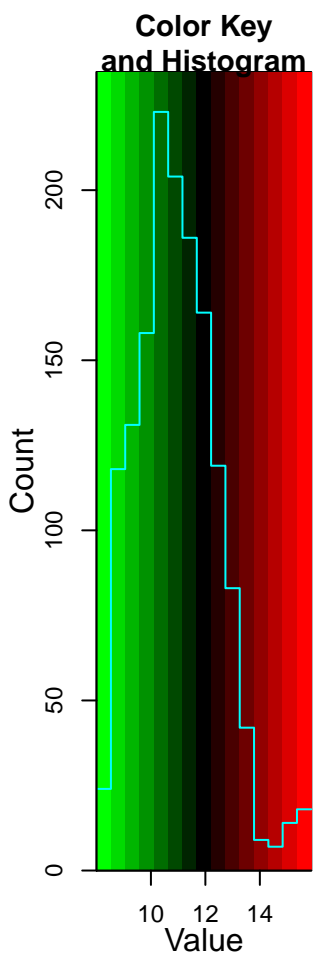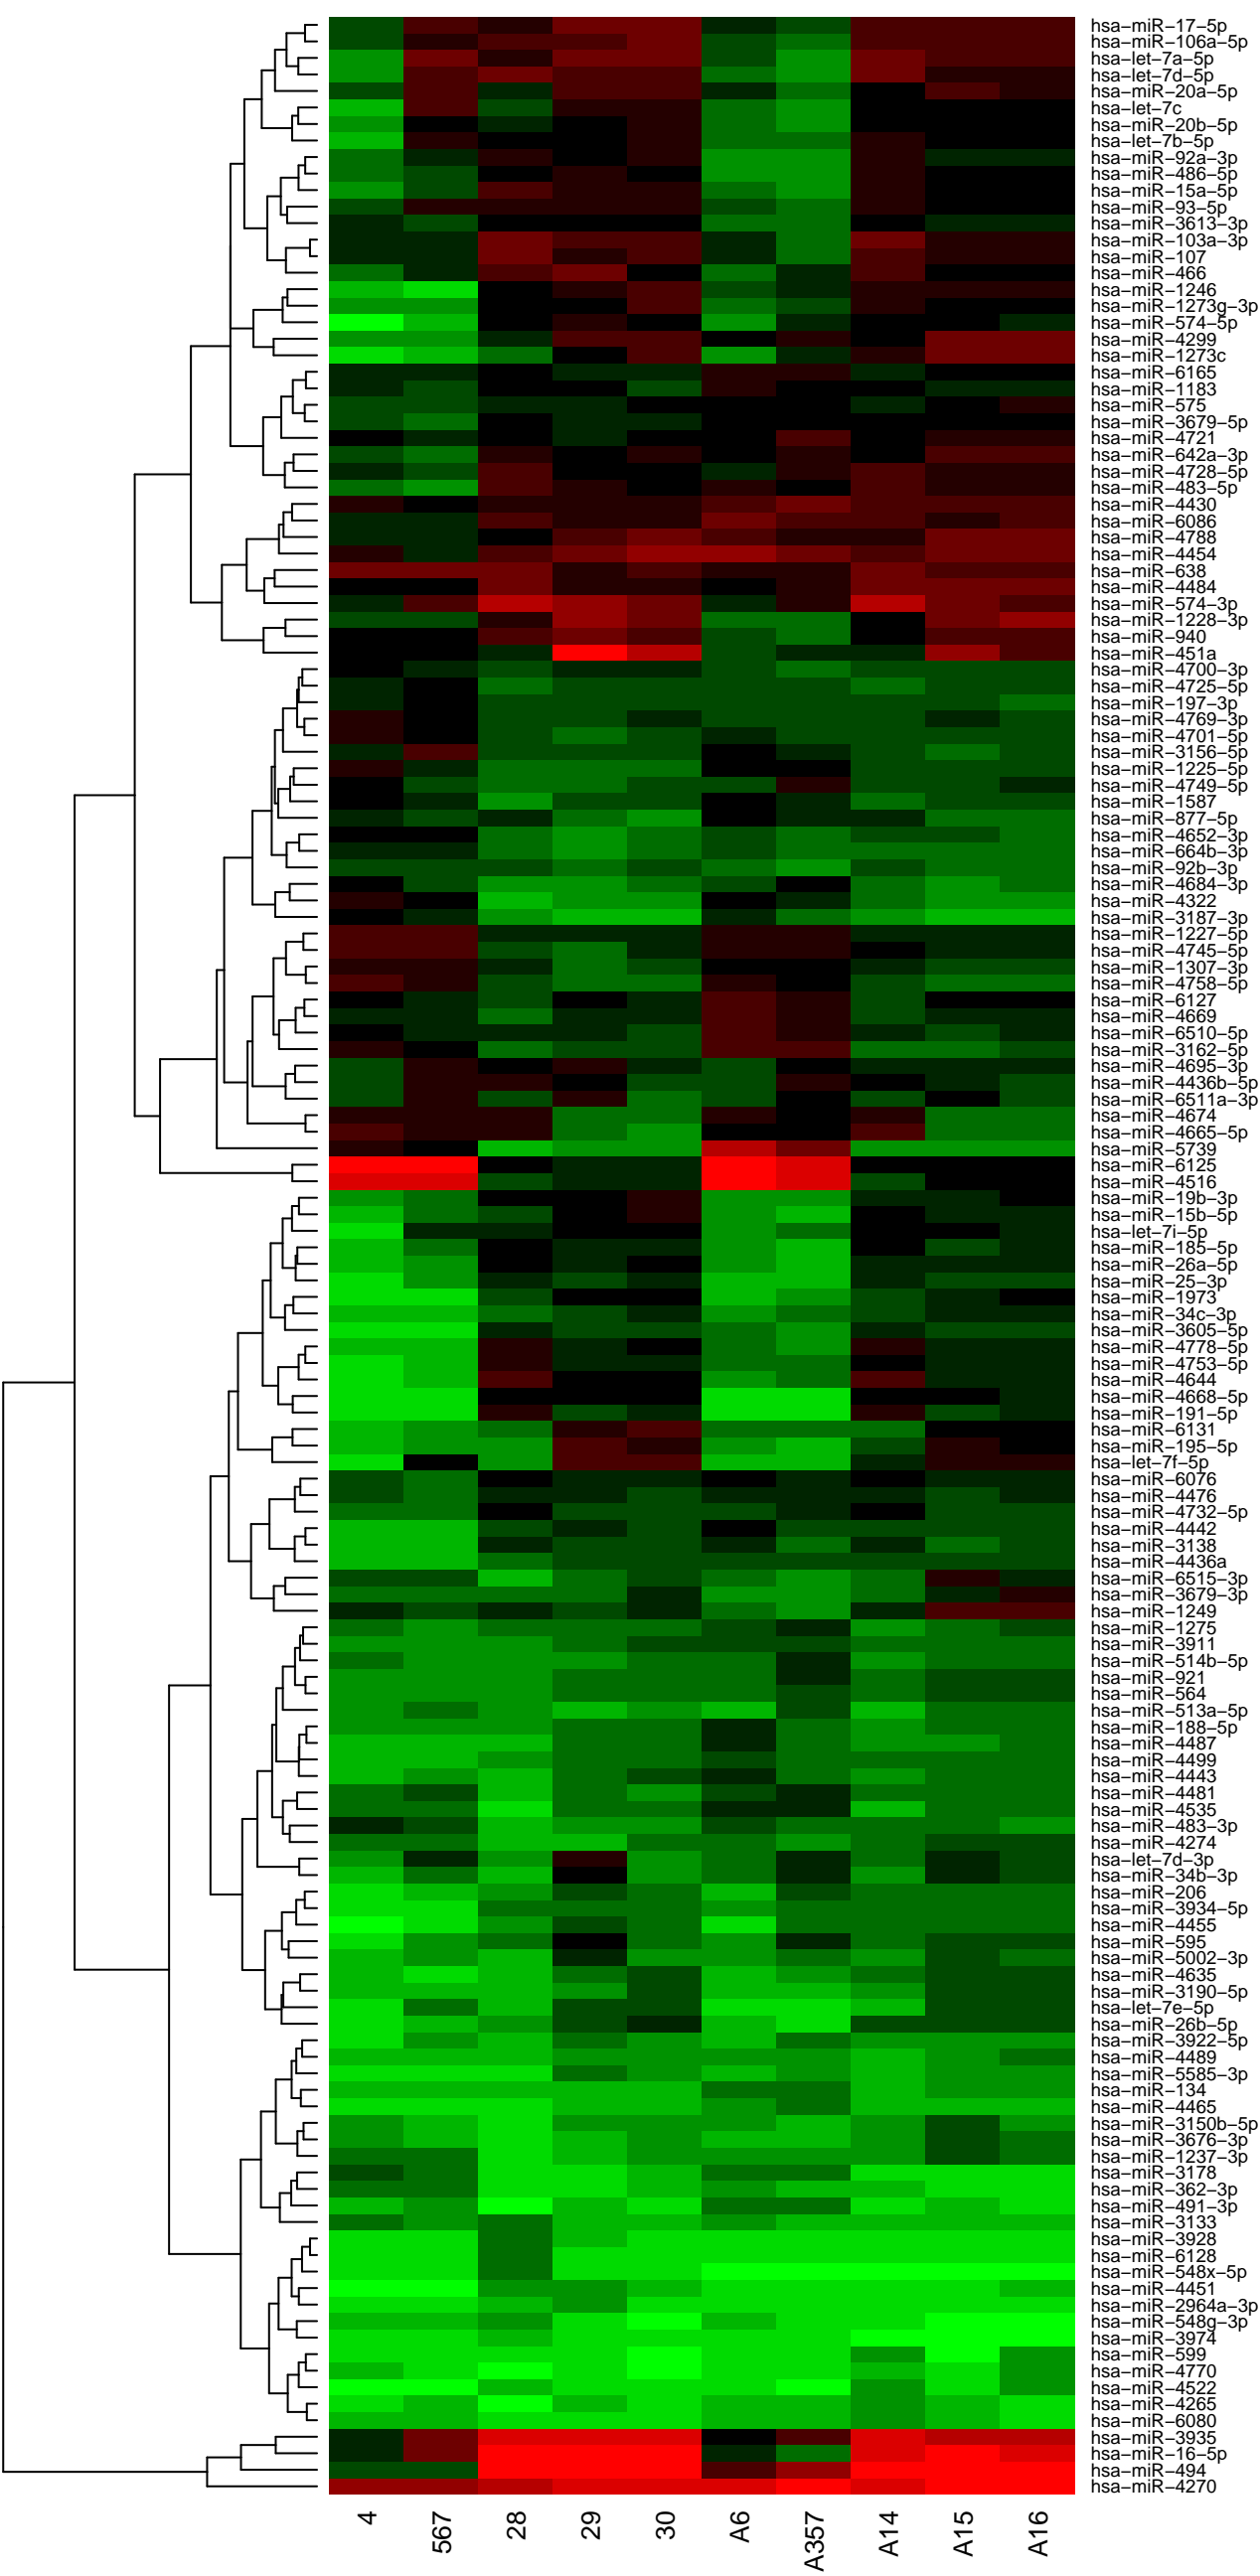

Supplement: pone.0129052.s002.pdf [file pone.0129052.s002.pdf]
