# Supplementary material for: Investigation of Gene Regulatory Networks Associated with Autism Spectrum Disorder Based on MiRNA Expression in China
Source: PubMed Central journal article supplement (PMC4462583; doi:10.1371/journal.pone.0129052), 2015-06-10

hsa-miR-34b-3p

hsa-miR-103a-3p

hsa-let-7d-5p

hsa-let-7a-5p

hsa-miR-1228-3p

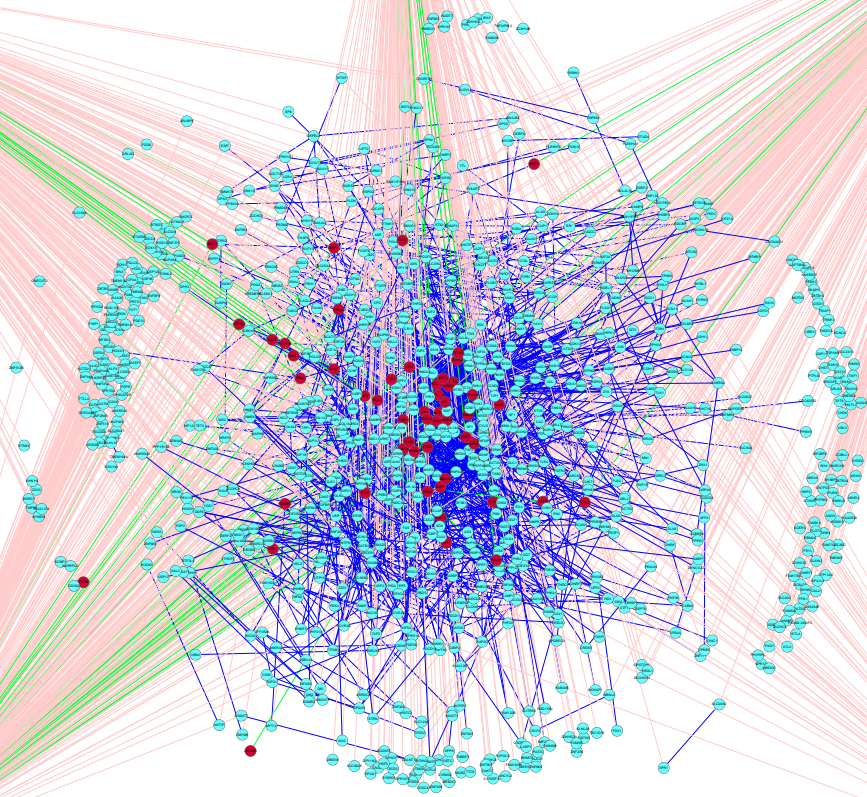

Supplement: pone.0129052.s003.pdf [file pone.0129052.s003.pdf]
